# Supplementary material for: Efficacy of combination treatment using YHO-1701, an orally active STAT3 inhibitor, with molecular-targeted agents on cancer cell lines
Source: PubMed Central journal article supplement (PMC7988006; doi:10.1038/s41598-021-86021-8), 2021-03-23

**Title page****Title:**

Efficacy of combination treatment using YHO-1701, an orally active STAT3 inhibitor, with molecular-targeted agents on cancer cell lines

**Authors' names:**

Keisuke Taniguchi<sup>1</sup>, Hiroaki Konishi<sup>1</sup>, Akiko Yoshinaga<sup>1</sup>, Momomi Tsugane<sup>1</sup>, Hiroyuki Takahashi<sup>2</sup>,  
Fukiko Nishisaka<sup>1,3</sup>, Yoshiyuki Shishido<sup>1</sup>, Akira Asai<sup>3</sup>

**Authors' affiliations:**

1 Yakult Central Institute, Yakult Honsha Co., Ltd., Tokyo; 2 Pharmaceutical Department, Yakult Honsha Co., Ltd., Tokyo; 3 Center for Drug Discovery, Graduate School of Pharmaceutical Sciences, University of Shizuoka, Shizuoka, Japan.

**Corresponding author:**

Keisuke Taniguchi, Pharmaceutical Research Department, Yakult Central Institute, Yakult Honsha Co., Ltd., 5-11 Izumi, Kunitachi-shi, Tokyo 186-8650, Japan. Phone: +81425778960. Fax: +81425773020.  
Email: keisuke-taniguchi@yakult.co.jp

## *Supplementary Information*

### **Supplementary Table S1. Cell viability of different cell lines treated with YHO-1701 and/or already-available targeted agents at indicated doses.**

The antiproliferative effects of YHO-1701 and/or molecular-targeted agents were evaluated in a human cancer cell line panel using the WST-8 assay at 48 or 72 h of exposure. Representative data are shown of at least three independent experiments.

| <b>K562</b>                 |                             |                          |                          |                       |
|-----------------------------|-----------------------------|--------------------------|--------------------------|-----------------------|
| YHO-1701 dose<br>( $\mu$ M) | Imatinib dose<br>( $\mu$ M) | % Survival<br>(YHO-1701) | % Survival<br>(Imatinib) | % Survival<br>(Combo) |
| 0.5                         | 0.075                       | 90                       | 88                       | 76                    |
| 1                           | 0.15                        | 53                       | 63                       | 35                    |
| 2                           | 0.3                         | 41                       | 34                       | 17                    |
| 4                           | 0.6                         | 37                       | 19                       | 10                    |
| 8                           | 1.2                         | 25                       | 15                       | 7                     |

| <b>K562</b>                 |                        |                          |                           |                       |
|-----------------------------|------------------------|--------------------------|---------------------------|-----------------------|
| YHO-1701 dose<br>( $\mu$ M) | Dasatinib dose<br>(nM) | % Survival<br>(YHO-1701) | % Survival<br>(Dasatinib) | % Survival<br>(Combo) |
| 0.375                       | 0.075                  | 92                       | 84                        | 81                    |
| 0.75                        | 0.15                   | 67                       | 69                        | 51                    |
| 1.5                         | 0.3                    | 38                       | 42                        | 18                    |
| 3                           | 0.6                    | 31                       | 20                        | 8                     |
| 6                           | 1.2                    | 25                       | 14                        | 9                     |

| <b>SUP-B15</b>              |                             |                          |                          |                       |
|-----------------------------|-----------------------------|--------------------------|--------------------------|-----------------------|
| YHO-1701 dose<br>( $\mu$ M) | Imatinib dose<br>( $\mu$ M) | % Survival<br>(YHO-1701) | % Survival<br>(Imatinib) | % Survival<br>(Combo) |
| 0.25                        | 0.0875                      | 97                       | 105                      | 96                    |
| 0.5                         | 0.175                       | 85                       | 75                       | 57                    |
| 1                           | 0.35                        | 49                       | 57                       | 33                    |
| 2                           | 0.7                         | 13                       | 50                       | 8                     |
| 4                           | 1.4                         | 8                        | 47                       | 6                     |

| <b>SUP-B15</b>                     |                        |                          |                           |                       |
|------------------------------------|------------------------|--------------------------|---------------------------|-----------------------|
| YHO-1701 dose<br>( $\mu\text{M}$ ) | Dasatinib dose<br>(nM) | % Survival<br>(YHO-1701) | % Survival<br>(Dasatinib) | % Survival<br>(Combo) |
| 0.25                               | 7.5                    | 94                       | 51                        | 45                    |
| 0.5                                | 15                     | 84                       | 50                        | 41                    |
| 1                                  | 30                     | 49                       | 45                        | 28                    |
| 2                                  | 60                     | 13                       | 30                        | 10                    |
| 4                                  | 120                    | 9                        | 23                        | 6                     |

| <b>H2228</b>                       |                                      |                          |                            |                       |
|------------------------------------|--------------------------------------|--------------------------|----------------------------|-----------------------|
| YHO-1701 dose<br>( $\mu\text{M}$ ) | Crizotinib dose<br>( $\mu\text{M}$ ) | % Survival<br>(YHO-1701) | % Survival<br>(Crizotinib) | % Survival<br>(Combo) |
| 2.5                                | 0.25                                 | 70                       | 68                         | 48                    |
| 5                                  | 0.5                                  | 63                       | 66                         | 33                    |
| 10                                 | 1                                    | 48                       | 56                         | 25                    |
| 20                                 | 2                                    | 43                       | 43                         | 21                    |
| 40                                 | 4                                    | 33                       | 19                         | 6                     |

| <b>H2228</b>                       |                                     |                          |                           |                       |
|------------------------------------|-------------------------------------|--------------------------|---------------------------|-----------------------|
| YHO-1701 dose<br>( $\mu\text{M}$ ) | Alectinib dose<br>( $\mu\text{M}$ ) | % Survival<br>(YHO-1701) | % Survival<br>(Alectinib) | % Survival<br>(Combo) |
| 2.5                                | 0.025                               | 54                       | 75                        | 47                    |
| 5                                  | 0.05                                | 49                       | 67                        | 33                    |
| 10                                 | 0.1                                 | 39                       | 60                        | 28                    |
| 20                                 | 0.2                                 | 29                       | 51                        | 21                    |
| 40                                 | 0.4                                 | 23                       | 42                        | 20                    |

| <b>H2228</b>                       |                                     |                          |                           |                       |
|------------------------------------|-------------------------------------|--------------------------|---------------------------|-----------------------|
| YHO-1701 dose<br>( $\mu\text{M}$ ) | Ceritinib dose<br>( $\mu\text{M}$ ) | % Survival<br>(YHO-1701) | % Survival<br>(Ceritinib) | % Survival<br>(Combo) |
| 2.5                                | 0.125                               | 62                       | 75                        | 46                    |
| 5                                  | 0.25                                | 60                       | 73                        | 33                    |
| 10                                 | 0.5                                 | 46                       | 65                        | 27                    |
| 20                                 | 1                                   | 40                       | 59                        | 21                    |
| 40                                 | 2                                   | 30                       | 41                        | 17                    |

| <b>H1975</b>                       |                                        |                          |                              |                       |
|------------------------------------|----------------------------------------|--------------------------|------------------------------|-----------------------|
| YHO-1701 dose<br>( $\mu\text{M}$ ) | Osimeertinib dose<br>( $\mu\text{M}$ ) | % Survival<br>(YHO-1701) | % Survival<br>(Osimeertinib) | % Survival<br>(Combo) |
| 0.5                                | 0.25                                   | 100                      | 53                           | 54                    |
| 1                                  | 0.5                                    | 90                       | 52                           | 50                    |
| 2                                  | 1                                      | 43                       | 49                           | 34                    |
| 4                                  | 2                                      | 28                       | 41                           | 15                    |
| 8                                  | 4                                      | 22                       | 28                           | 6                     |

| <b>PC-9</b>                        |                           |                          |                              |                       |
|------------------------------------|---------------------------|--------------------------|------------------------------|-----------------------|
| YHO-1701 dose<br>( $\mu\text{M}$ ) | Osimeertinib dose<br>(nM) | % Survival<br>(YHO-1701) | % Survival<br>(Osimeertinib) | % Survival<br>(Combo) |
| 0.25                               | 1.25                      | 94                       | 91                           | 95                    |
| 0.5                                | 2.5                       | 87                       | 82                           | 70                    |
| 1                                  | 5                         | 42                       | 64                           | 28                    |
| 2                                  | 10                        | 23                       | 42                           | 18                    |
| 4                                  | 20                        | 12                       | 28                           | 12                    |

| <b>PC-9</b>                        |                        |                          |                           |                       |
|------------------------------------|------------------------|--------------------------|---------------------------|-----------------------|
| YHO-1701 dose<br>( $\mu\text{M}$ ) | Gefitinib dose<br>(nM) | % Survival<br>(YHO-1701) | % Survival<br>(Gefitinib) | % Survival<br>(Combo) |
| 0.25                               | 2.5                    | 88                       | 88                        | 101                   |
| 0.5                                | 5                      | 78                       | 81                        | 78                    |
| 1                                  | 10                     | 42                       | 73                        | 39                    |
| 2                                  | 20                     | 23                       | 58                        | 20                    |
| 4                                  | 40                     | 10                       | 40                        | 12                    |

| <b>PC-9</b>                        |                        |                          |                           |                       |
|------------------------------------|------------------------|--------------------------|---------------------------|-----------------------|
| YHO-1701 dose<br>( $\mu\text{M}$ ) | Erlotinib dose<br>(nM) | % Survival<br>(YHO-1701) | % Survival<br>(Erlotinib) | % Survival<br>(Combo) |
| 0.25                               | 5                      | 95                       | 87                        | 90                    |
| 0.5                                | 10                     | 81                       | 76                        | 69                    |
| 1                                  | 20                     | 40                       | 57                        | 33                    |
| 2                                  | 40                     | 23                       | 39                        | 17                    |
| 4                                  | 80                     | 10                       | 28                        | 12                    |

| <b>PC-9</b>                        |                       |                          |                          |                       |
|------------------------------------|-----------------------|--------------------------|--------------------------|-----------------------|
| YHO-1701 dose<br>( $\mu\text{M}$ ) | Afatinib dose<br>(nM) | % Survival<br>(YHO-1701) | % Survival<br>(Afatinib) | % Survival<br>(Combo) |
| 0.25                               | 0.25                  | 94                       | 90                       | 102                   |
| 0.5                                | 0.5                   | 85                       | 86                       | 81                    |
| 1                                  | 1                     | 43                       | 63                       | 33                    |
| 2                                  | 2                     | 24                       | 35                       | 20                    |
| 4                                  | 4                     | 12                       | 28                       | 12                    |

| <b>SK-BR-3</b>                     |                        |                          |                           |                       |
|------------------------------------|------------------------|--------------------------|---------------------------|-----------------------|
| YHO-1701 dose<br>( $\mu\text{M}$ ) | Lapatinib dose<br>(nM) | % Survival<br>(YHO-1701) | % Survival<br>(Lapatinib) | % Survival<br>(Combo) |
| 0.25                               | 12.5                   | 75                       | 76                        | 67                    |
| 0.5                                | 25                     | 63                       | 67                        | 53                    |
| 1                                  | 50                     | 51                       | 57                        | 41                    |
| 2                                  | 100                    | 36                       | 49                        | 28                    |
| 4                                  | 200                    | 25                       | 42                        | 19                    |

| <b>BT-474</b>                      |                        |                          |                           |                       |
|------------------------------------|------------------------|--------------------------|---------------------------|-----------------------|
| YHO-1701 dose<br>( $\mu\text{M}$ ) | Lapatinib dose<br>(nM) | % Survival<br>(YHO-1701) | % Survival<br>(Lapatinib) | % Survival<br>(Combo) |
| 0.25                               | 5                      | 82                       | 99                        | 88                    |
| 0.5                                | 10                     | 78                       | 69                        | 60                    |
| 1                                  | 20                     | 55                       | 46                        | 32                    |
| 2                                  | 40                     | 35                       | 32                        | 22                    |
| 4                                  | 80                     | 33                       | 22                        | 21                    |

| <b>MCF-7</b>                       |                         |                          |                            |                       |
|------------------------------------|-------------------------|--------------------------|----------------------------|-----------------------|
| YHO-1701 dose<br>( $\mu\text{M}$ ) | Everolimus dose<br>(nM) | % Survival<br>(YHO-1701) | % Survival<br>(Everolimus) | % Survival<br>(Combo) |
| 0.5                                | 0.375                   | 94                       | 71                         | 67                    |
| 1                                  | 0.75                    | 80                       | 59                         | 51                    |
| 2                                  | 1.5                     | 47                       | 52                         | 36                    |
| 4                                  | 3                       | 31                       | 47                         | 23                    |
| 8                                  | 6                       | 24                       | 45                         | 20                    |

| <b>SAS</b>                         |                                     |                          |                           |                       |
|------------------------------------|-------------------------------------|--------------------------|---------------------------|-----------------------|
| YHO-1701 dose<br>( $\mu\text{M}$ ) | Sorafenib dose<br>( $\mu\text{M}$ ) | % Survival<br>(YHO-1701) | % Survival<br>(Sorafenib) | % Survival<br>(Combo) |
| 0.125                              | 0.75                                | 103                      | 82                        | 75                    |
| 0.25                               | 1.5                                 | 95                       | 70                        | 37                    |
| 0.5                                | 3                                   | 61                       | 47                        | 13                    |
| 1                                  | 6                                   | 39                       | 19                        | 14                    |
| 2                                  | 12                                  | 15                       | 15                        | 12                    |

| <b>K1</b>                          |                                     |                          |                           |                       |
|------------------------------------|-------------------------------------|--------------------------|---------------------------|-----------------------|
| YHO-1701 dose<br>( $\mu\text{M}$ ) | Sorafenib dose<br>( $\mu\text{M}$ ) | % Survival<br>(YHO-1701) | % Survival<br>(Sorafenib) | % Survival<br>(Combo) |
| 1.75                               | 2.5                                 | 80                       | 77                        | 80                    |
| 3.5                                | 5                                   | 79                       | 73                        | 44                    |
| 7                                  | 10                                  | 46                       | 39                        | 10                    |
| 14                                 | 20                                  | 41                       | 8                         | 1                     |
| 28                                 | 40                                  | 23                       | 0                         | 3                     |

| <b>FTC-133</b>                     |                                     |                          |                           |                       |
|------------------------------------|-------------------------------------|--------------------------|---------------------------|-----------------------|
| YHO-1701 dose<br>( $\mu\text{M}$ ) | Sorafenib dose<br>( $\mu\text{M}$ ) | % Survival<br>(YHO-1701) | % Survival<br>(Sorafenib) | % Survival<br>(Combo) |
| 0.625                              | 2                                   | 77                       | 83                        | 64                    |
| 1.25                               | 4                                   | 51                       | 72                        | 43                    |
| 2.5                                | 8                                   | 43                       | 43                        | 27                    |
| 5                                  | 16                                  | 43                       | 19                        | 12                    |
| 10                                 | 32                                  | 29                       | 1                         | 1                     |

| <b>K1</b>                          |                                      |                          |                            |                       |
|------------------------------------|--------------------------------------|--------------------------|----------------------------|-----------------------|
| YHO-1701 dose<br>( $\mu\text{M}$ ) | Vandetanib dose<br>( $\mu\text{M}$ ) | % Survival<br>(YHO-1701) | % Survival<br>(Vandetanib) | % Survival<br>(Combo) |
| 1.75                               | 3.75                                 | 77                       | 110                        | 79                    |
| 3.5                                | 7.5                                  | 75                       | 111                        | 29                    |
| 7                                  | 15                                   | 45                       | 42                         | 3                     |
| 14                                 | 30                                   | 39                       | 1                          | 1                     |
| 28                                 | 60                                   | 22                       | 0                          | 0                     |

| <b>FTC-133</b>                     |                                      |                          |                            |                       |
|------------------------------------|--------------------------------------|--------------------------|----------------------------|-----------------------|
| YHO-1701 dose<br>( $\mu\text{M}$ ) | Vandetanib dose<br>( $\mu\text{M}$ ) | % Survival<br>(YHO-1701) | % Survival<br>(Vandetanib) | % Survival<br>(Combo) |
| 0.625                              | 3.75                                 | 83                       | 96                         | 77                    |
| 1.25                               | 7.5                                  | 55                       | 91                         | 41                    |
| 2.5                                | 15                                   | 47                       | 44                         | 27                    |
| 5                                  | 30                                   | 45                       | 9                          | 5                     |
| 10                                 | 60                                   | 32                       | 0                          | 0                     |

| <b>COLO205</b>                     |                                       |                          |                             |                       |
|------------------------------------|---------------------------------------|--------------------------|-----------------------------|-----------------------|
| YHO-1701 dose<br>( $\mu\text{M}$ ) | Regorafenib dose<br>( $\mu\text{M}$ ) | % Survival<br>(YHO-1701) | % Survival<br>(Regorafenib) | % Survival<br>(Combo) |
| 0.25                               | 0.375                                 | 89                       | 92                          | 84                    |
| 0.5                                | 0.75                                  | 69                       | 86                          | 64                    |
| 1                                  | 1.5                                   | 47                       | 72                          | 38                    |
| 2                                  | 3                                     | 23                       | 53                          | 20                    |
| 4                                  | 6                                     | 16                       | 27                          | 16                    |

| <b>HCT-15</b>                      |                                       |                          |                             |                       |
|------------------------------------|---------------------------------------|--------------------------|-----------------------------|-----------------------|
| YHO-1701 dose<br>( $\mu\text{M}$ ) | Regorafenib dose<br>( $\mu\text{M}$ ) | % Survival<br>(YHO-1701) | % Survival<br>(Regorafenib) | % Survival<br>(Combo) |
| 0.25                               | 1.25                                  | 95                       | 89                          | 79                    |
| 0.5                                | 2.5                                   | 81                       | 72                          | 57                    |
| 1                                  | 5                                     | 58                       | 48                          | 35                    |
| 2                                  | 10                                    | 25                       | 29                          | 16                    |
| 4                                  | 20                                    | 18                       | 11                          | 12                    |

| <b>SK-MEL-5</b>                    |                         |                          |                            |                       |
|------------------------------------|-------------------------|--------------------------|----------------------------|-----------------------|
| YHO-1701 dose<br>( $\mu\text{M}$ ) | Trametinib dose<br>(nM) | % Survival<br>(YHO-1701) | % Survival<br>(Trametinib) | % Survival<br>(Combo) |
| 0.625                              | 0.5                     | 87                       | 61                         | 54                    |
| 1.25                               | 1                       | 52                       | 46                         | 34                    |
| 2.5                                | 2                       | 48                       | 40                         | 24                    |
| 5                                  | 4                       | 35                       | 33                         | 22                    |
| 10                                 | 8                       | 13                       | 33                         | 20                    |

| <b>SK-MEL-28</b>            |                         |                          |                            |                       |
|-----------------------------|-------------------------|--------------------------|----------------------------|-----------------------|
| YHO-1701 dose<br>( $\mu$ M) | Trametinib dose<br>(nM) | % Survival<br>(YHO-1701) | % Survival<br>(Trametinib) | % Survival<br>(Combo) |
| 2.5                         | 0.5                     | 74                       | 98                         | 72                    |
| 5                           | 1                       | 65                       | 71                         | 63                    |
| 10                          | 2                       | 42                       | 47                         | 59                    |
| 20                          | 4                       | 28                       | 35                         | 37                    |
| 40                          | 8                       | 21                       | 26                         | 27                    |

| <b>A375</b>                 |                         |                          |                            |                       |
|-----------------------------|-------------------------|--------------------------|----------------------------|-----------------------|
| YHO-1701 dose<br>( $\mu$ M) | Trametinib dose<br>(nM) | % Survival<br>(YHO-1701) | % Survival<br>(Trametinib) | % Survival<br>(Combo) |
| 0.125                       | 0.125                   | 104                      | 100                        | 101                   |
| 0.25                        | 0.25                    | 101                      | 96                         | 92                    |
| 0.5                         | 0.5                     | 68                       | 78                         | 57                    |
| 1                           | 1                       | 43                       | 33                         | 34                    |
| 2                           | 2                       | 28                       | 22                         | 17                    |

| <b>A2058</b>                |                         |                          |                            |                       |
|-----------------------------|-------------------------|--------------------------|----------------------------|-----------------------|
| YHO-1701 dose<br>( $\mu$ M) | Trametinib dose<br>(nM) | % Survival<br>(YHO-1701) | % Survival<br>(Trametinib) | % Survival<br>(Combo) |
| 0.175                       | 1.25                    | 99                       | 91                         | 90                    |
| 0.35                        | 2.5                     | 96                       | 81                         | 75                    |
| 0.7                         | 5                       | 62                       | 68                         | 52                    |
| 1.4                         | 10                      | 36                       | 53                         | 30                    |
| 2.8                         | 20                      | 33                       | 48                         | 25                    |

| <b>SK-MEL-5</b>             |                                |                          |                             |                       |
|-----------------------------|--------------------------------|--------------------------|-----------------------------|-----------------------|
| YHO-1701 dose<br>( $\mu$ M) | Vemurafenib dose<br>( $\mu$ M) | % Survival<br>(YHO-1701) | % Survival<br>(Vemurafenib) | % Survival<br>(Combo) |
| 0.625                       | 0.25                           | 84                       | 56                          | 52                    |
| 1.25                        | 0.5                            | 53                       | 45                          | 36                    |
| 2.5                         | 1                              | 50                       | 40                          | 30                    |
| 5                           | 2                              | 38                       | 36                          | 29                    |
| 10                          | 4                              | 20                       | 30                          | 22                    |



| <b>SK-MEL-28</b>                   |                                       |                          |                             |                       |
|------------------------------------|---------------------------------------|--------------------------|-----------------------------|-----------------------|
| YHO-1701 dose<br>( $\mu\text{M}$ ) | Vemurafenib dose<br>( $\mu\text{M}$ ) | % Survival<br>(YHO-1701) | % Survival<br>(Vemurafenib) | % Survival<br>(Combo) |
| 2.5                                | 0.075                                 | 75                       | 89                          | 65                    |
| 5                                  | 0.15                                  | 66                       | 70                          | 57                    |
| 10                                 | 0.3                                   | 42                       | 51                          | 53                    |
| 20                                 | 0.6                                   | 28                       | 38                          | 33                    |
| 40                                 | 1.2                                   | 22                       | 31                          | 29                    |

| <b>A375</b>                        |                                       |                          |                             |                       |
|------------------------------------|---------------------------------------|--------------------------|-----------------------------|-----------------------|
| YHO-1701 dose<br>( $\mu\text{M}$ ) | Vemurafenib dose<br>( $\mu\text{M}$ ) | % Survival<br>(YHO-1701) | % Survival<br>(Vemurafenib) | % Survival<br>(Combo) |
| 0.125                              | 0.0125                                | 98                       | 100                         | 100                   |
| 0.25                               | 0.025                                 | 93                       | 82                          | 84                    |
| 0.5                                | 0.05                                  | 63                       | 59                          | 56                    |
| 1                                  | 0.1                                   | 42                       | 35                          | 51                    |
| 2                                  | 0.2                                   | 30                       | 26                          | 23                    |

| <b>A2058</b>                       |                                       |                          |                             |                       |
|------------------------------------|---------------------------------------|--------------------------|-----------------------------|-----------------------|
| YHO-1701 dose<br>( $\mu\text{M}$ ) | Vemurafenib dose<br>( $\mu\text{M}$ ) | % Survival<br>(YHO-1701) | % Survival<br>(Vemurafenib) | % Survival<br>(Combo) |
| 0.175                              | 1.25                                  | 102                      | 70                          | 71                    |
| 0.35                               | 2.5                                   | 96                       | 59                          | 53                    |
| 0.7                                | 5                                     | 59                       | 47                          | 35                    |
| 1.4                                | 10                                    | 36                       | 37                          | 20                    |
| 2.8                                | 20                                    | 32                       | 19                          | 13                    |

| <b>SK-MEL-28</b>                   |                         |                          |                            |                       |
|------------------------------------|-------------------------|--------------------------|----------------------------|-----------------------|
| YHO-1701 dose<br>( $\mu\text{M}$ ) | Dabrafenib dose<br>(nM) | % Survival<br>(YHO-1701) | % Survival<br>(Dabrafenib) | % Survival<br>(Combo) |
| 2.5                                | 2.5                     | 73                       | 81                         | 64                    |
| 5                                  | 5                       | 65                       | 62                         | 58                    |
| 10                                 | 10                      | 39                       | 47                         | 54                    |
| 20                                 | 20                      | 27                       | 36                         | 37                    |
| 40                                 | 40                      | 21                       | 32                         | 29                    |

| <b>A375</b>                 |                         |                          |                            |                       |
|-----------------------------|-------------------------|--------------------------|----------------------------|-----------------------|
| YHO-1701 dose<br>( $\mu$ M) | Dabrafenib dose<br>(nM) | % Survival<br>(YHO-1701) | % Survival<br>(Dabrafenib) | % Survival<br>(Combo) |
| 0.125                       | 1.25                    | 101                      | 76                         | 78                    |
| 0.25                        | 2.5                     | 90                       | 56                         | 53                    |
| 0.5                         | 5                       | 56                       | 37                         | 36                    |
| 1                           | 10                      | 36                       | 25                         | 32                    |
| 2                           | 20                      | 29                       | 21                         | 17                    |

| <b>A2058</b>                |                               |                          |                            |                       |
|-----------------------------|-------------------------------|--------------------------|----------------------------|-----------------------|
| YHO-1701 dose<br>( $\mu$ M) | Dabrafenib dose<br>( $\mu$ M) | % Survival<br>(YHO-1701) | % Survival<br>(Dabrafenib) | % Survival<br>(Combo) |
| 0.7                         | 12.5                          | 63                       | 67                         | 55                    |
| 1.4                         | 25                            | 37                       | 61                         | 40                    |
| 2.8                         | 50                            | 33                       | 47                         | 18                    |
| 5.6                         | 100                           | 23                       | 23                         | 5                     |

**Supplementary Table S2. List of cancer cell lines and their origins used in this study.**

| <b>Cancer type</b>           | <b>Cell line</b>  | <b>Supplier</b> | <b>Culture medium</b>                      |
|------------------------------|-------------------|-----------------|--------------------------------------------|
| BCR-ABL-positive leukemia    | K562              | ATCC            | IMDM/10% FBS                               |
|                              | SUP-B15           | ATCC            | IMDM/20% FBS<br>+ 0.05mM 2-Mercaptoethanol |
| EML4-ALK-positive NSCLC      | NCI-H2228 (H2228) | ATCC            | RPMI1640/10% FBS                           |
| EGFR mutation-positive NSCLC | NCI-H1975 (H1975) | ATCC            | RPMI1640/10% FBS                           |
|                              | PC-9              | ECACC           | RPMI1640/10% FBS                           |
| Breast                       | SK-BR-3           | ATCC            | RPMI1640/10% FBS                           |
|                              | BT-474            | ATCC            | RPMI1640/10% FBS                           |
|                              | MCF-7             | ATCC            | DMEM/10% FBS                               |
| Oral                         | SAS               | JCRB            | DMEM/F12 /10% FBS                          |
| Thyroid                      | K1                | ECACC           | IMDM/10% FBS                               |
|                              | FTC-133           | ECACC           | IMDM/10% FBS                               |
| Colon                        | COLO205           | ATCC            | RPMI 1640/10% FBS                          |
|                              | HCT-15            | ATCC            | RPMI1640/10% FBS                           |
| Melanoma                     | SK-MEL-5          | ATCC            | DMEM/10% FBS                               |
|                              | SK-MEL-28         | ATCC            | DMEM/10% FBS                               |
|                              | A375              | ATCC            | DMEM/10% FBS                               |
|                              | A2058             | ATCC            | DMEM/10% FBS                               |

ATCC, American Type Culture Collection (Manassas, VA); ECACC, European Collection of Authenticated Cell Cultures (Salisbury, UK); JCRB, Japanese Collection of Research Bioresources (Osaka, Japan).

**Supplementary Table S3. List of already-available targeted agents used in this study.**

| <b>Molecular-targeted agent</b> | <b>Drug target</b> | <b>Company and catalog number</b>          |
|---------------------------------|--------------------|--------------------------------------------|
| Imatinib                        | BCR-ABL            | Cell Signaling Technologies (No. 9084)     |
| Dasatinib                       | BCR-ABL            | Bio Vision (No. 1586)                      |
| Crizotinib                      | ALK                | LC Laboratories (No. C-7900)               |
| Alectinib                       | ALK                | Selleck Chemicals (No. S2762)              |
| Ceritinib                       | ALK                | Active Biochem (No. A-1189)                |
| Osimertinib                     | EGFR               | Selleck Chemicals (No. S7297)              |
| Gefitinib *                     | EGFR               | Yakult Honsha Co., Ltd.                    |
| Everolimus                      | mTOR               | LC Laboratories (No. E-4040)               |
| Erlotinib                       | EGFR               | Santa Cruz Biotechnologies (No. sc-202154) |
| Afatinib                        | EGFR               | Santa Cruz Biotechnologies (No. sc-364398) |
| Lapatinib                       | HER2/EGFR          | Santa Cruz Biotechnologies (No. sc-202205) |
| Sorafenib                       | Multi Kinases      | Cayman Chemical (No. 10009644)             |
| Vandetanib                      | Multi Kinases      | Santa Cruz Biotechnologies (No. sc-220364) |
| Regorafenib                     | Multi Kinases      | Active Biochem (No. A-1486)                |
| Trametinib                      | MEK                | LC Laboratories (No. T-8123)               |
| Vemurafenib                     | BRAF               | LC Laboratories (No. V-2800)               |
| Dabrafenib                      | BRAF               | Santa Cruz Biotechnologies (No. sc-364477) |

\*: Gefitinib was synthesized at Yakult Honsha Co., Ltd.

**Supplementary Table S4. List of primary antibodies, including company catalog number.**

| <b>Western blotting primary antibody</b> | <b>Dilution</b> | <b>Company and catalog number</b>        |
|------------------------------------------|-----------------|------------------------------------------|
| Rabbit anti-p-ALK<br>(Y1278/Y1282/Y1283) | 1:1000          | Cell Signaling Technologies (No. 3983)   |
| Rabbit anti-ALK                          | 1:1000          | Cell Signaling Technologies (No. 3633)   |
| Rabbit anti-p-AKT (S473)                 | 1:3000          | Cell Signaling Technologies (No. 4058)   |
| Rabbit anti-p-ERK1/2 (T202/Y204)         | 1:1000          | Cell Signaling Technologies (No. 4370)   |
| Rabbit anti-ERK1/2                       | 1:1000          | Cell Signaling Technologies (No. 9102)   |
| Rabbit anti-p-STAT3 (Y705)               | 1:1000          | Cell Signaling Technologies (No. 9131)   |
| Rabbit anti-STAT3                        | 1:2000          | Cell Signaling Technologies (No. 4904)   |
| Rabbit anti-p-c-Abl (Y245)               | 1:1000          | Cell Signaling Technologies (No. 2861)   |
| Rabbit anti-c-Abl                        | 1:1000          | Cell Signaling Technologies (No. 2862)   |
| Rabbit anti-p-EGFR (Y1068)               | 1:1000          | Cell Signaling Technologies (No. 3777)   |
| Rabbit anti-EGFR                         | 1:1000          | Cell Signaling Technologies (No. 4267)   |
| Rabbit anti-p-STAT5 (Y694)               | 1:1000          | Cell Signaling Technologies (No. 9351)   |
| Rabbit anti-AKT                          | 1:1000          | Santa Cruz Biotechnologies (No. sc-8312) |
| Rabbit anti-STAT5                        | 1:1000          | Santa Cruz Biotechnologies (No. sc-835)  |
| Rabbit anti-survivin                     | 1:1000          | R&D Systems (No. AF886)                  |
| Mouse anti- $\beta$ -actin               | 1:5000          | Sigma-Aldrich (No. A5316)                |

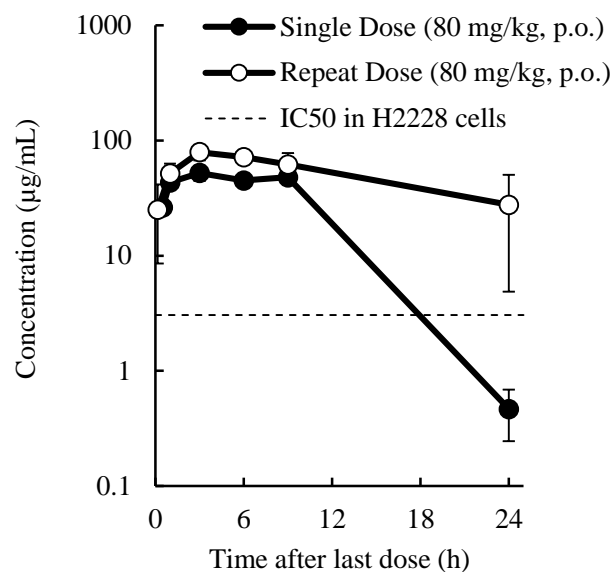

**Supplementary Figure S1. YHO-1701 concentration-time profile in plasma after oral administration of single and repeat doses in mice.**

The plasma concentration-time course of YHO-1701 (80 mg/kg) was shown in mice following single (n = 3) and 5-day repeated (n = 6) oral administrations. Blood samples were collected at 6 intervals. Data represent mean  $\pm$  SD. The antiproliferative effect of YHO-1701 was evaluated in H2228 cells using the WST-8 assay after 72 h of exposure. Experiments were performed in triplicates. The horizontal dotted line at 3.05  $\mu\text{g/mL}$  (6.55  $\mu\text{M}$ ) represents the *in vitro*  $\text{IC}_{50}$  for H2228 cells.

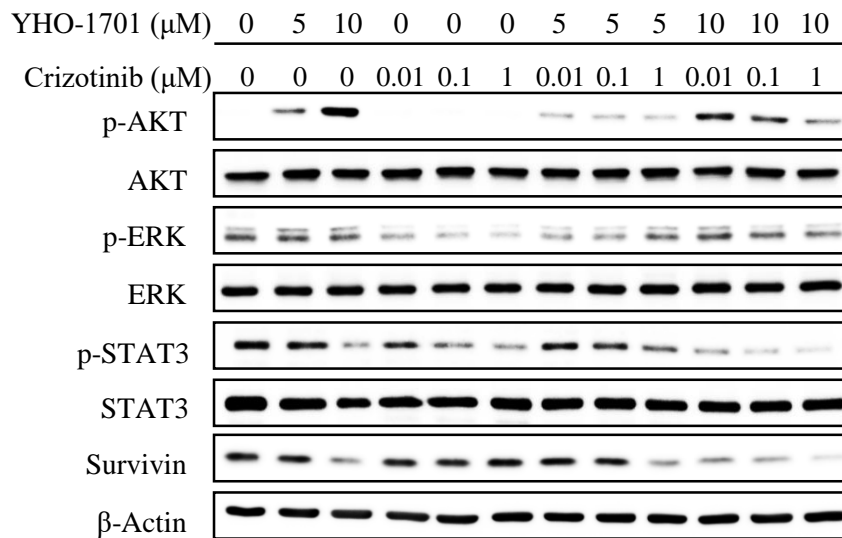

**Supplementary Figure S2. Analysis of change in crucial molecules in each pathway when YHO-1701 was treated with crizotinib in H2228 cells.**

Phosphorylation and activation of key molecules in the ALK and STAT3 signaling pathways were examined with western blotting. H2228 cells were left untreated or treated with YHO-1701 and/or crizotinib at the indicated doses for 24 h. The blots were probed with the respective primary antibodies. Cropped images are shown and the full-length blots are presented in Supplementary Fig. S3.

**Supplementary Figure S3. Full-length images of blots presented in the main figures.**

The full blot of p-BCR-ABL in Figure 3B

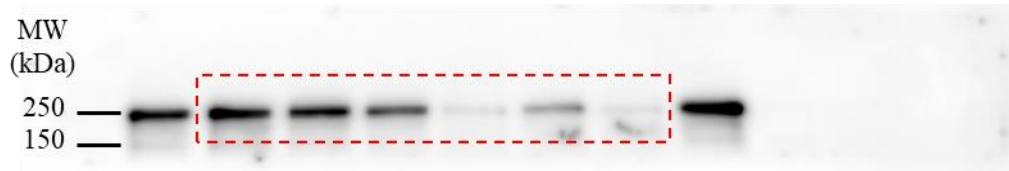

The full blot of BCR-ABL in Figure 3B

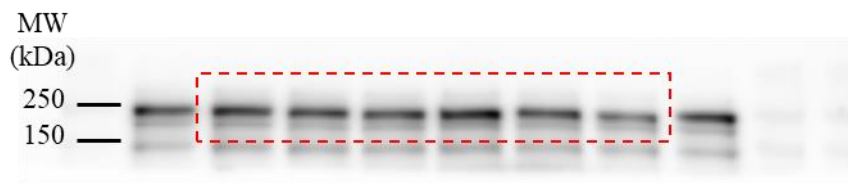

The full blot of p-STAT5 in Figure 3B

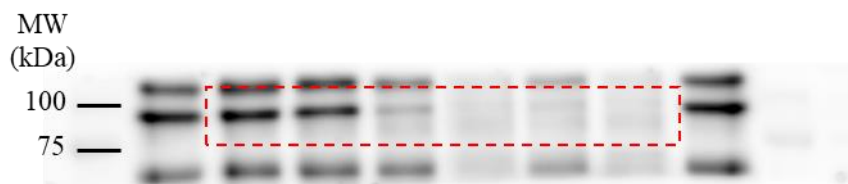

The full blot of STAT5 in Figure 3B

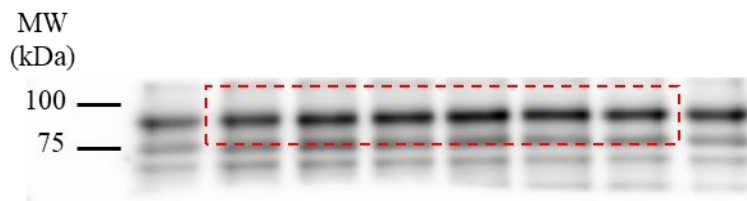

The full blot of p-STAT3 in Figure 3B

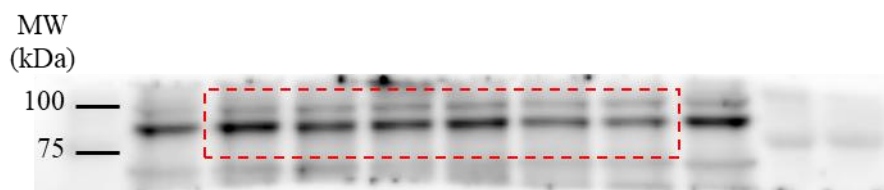



The full blot of STAT3 in Figure 3B [high contrast (upper); low contrast (lower)]

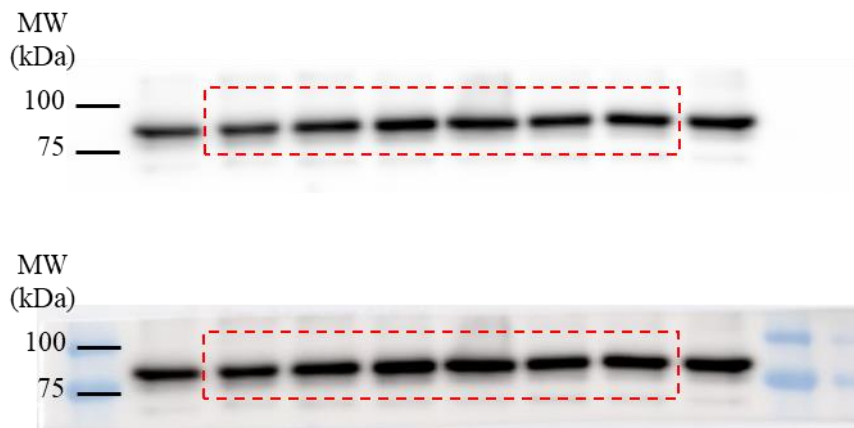

The full blot of survivin in Figure 3B

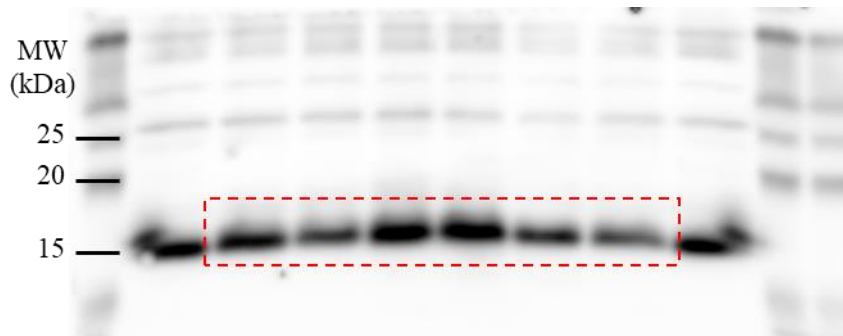

The full blot of  $\beta$ -Actin in Figure 3B [high contrast (upper); low contrast (lower)]

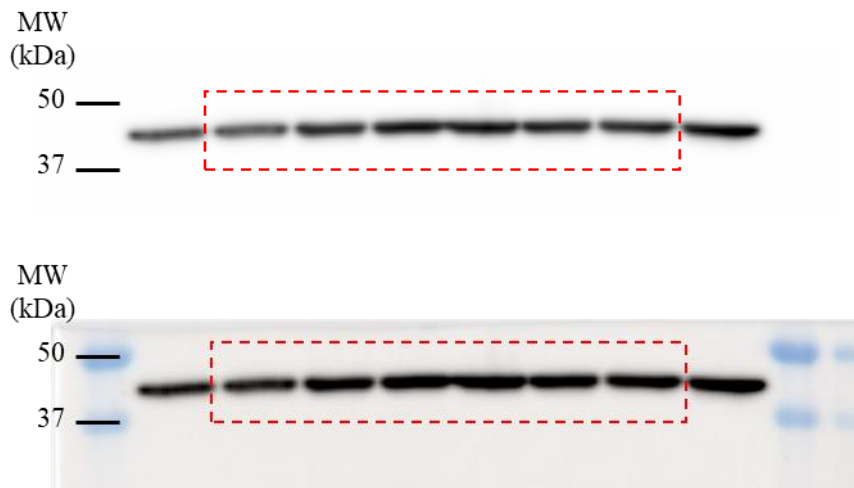

The full blot of p-EGFR in Figure 4B

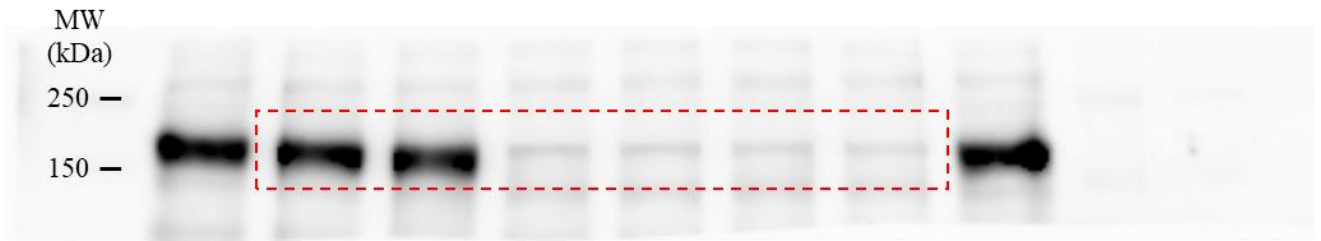

The full blot of EGFR in Figure 4B

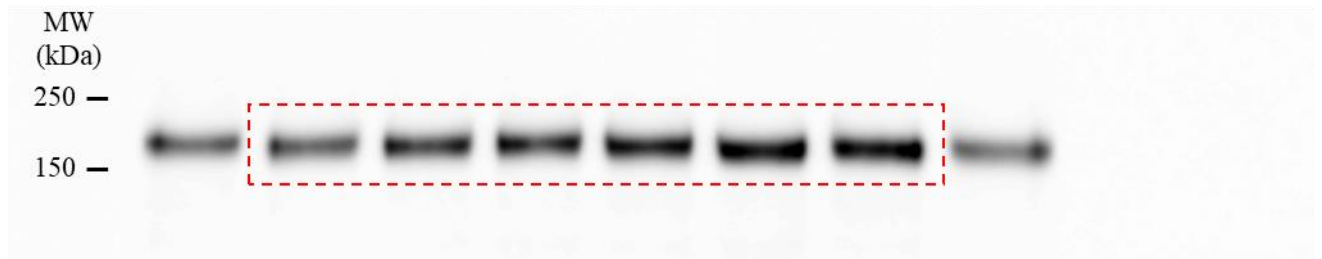

The full blot of p-AKT in Figure 4B

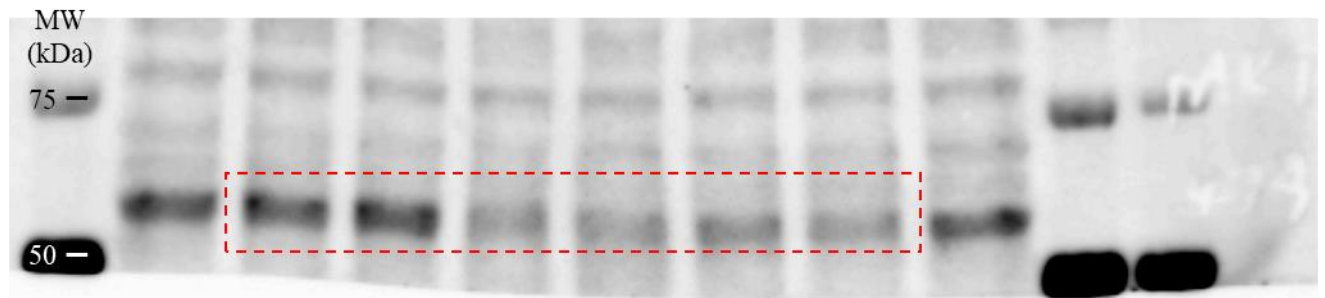

The full blot of AKT in Figure 4B

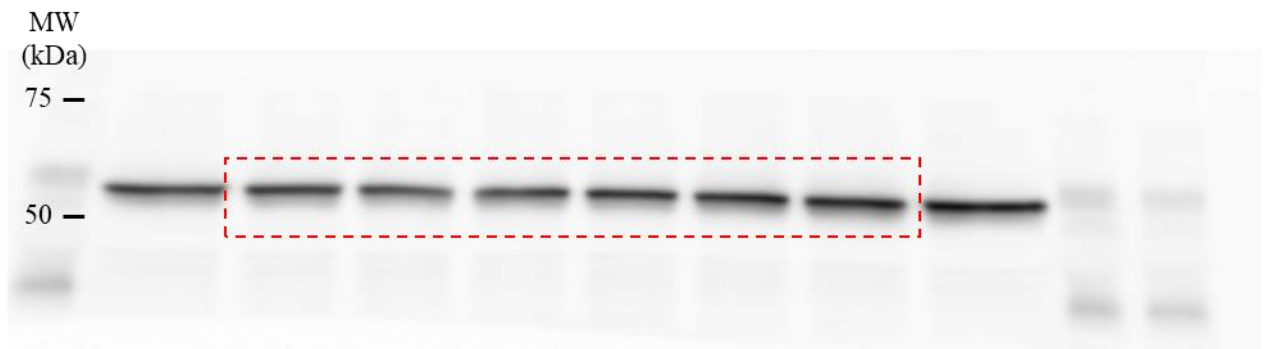

The full blot of p-ERK in Figure 4B

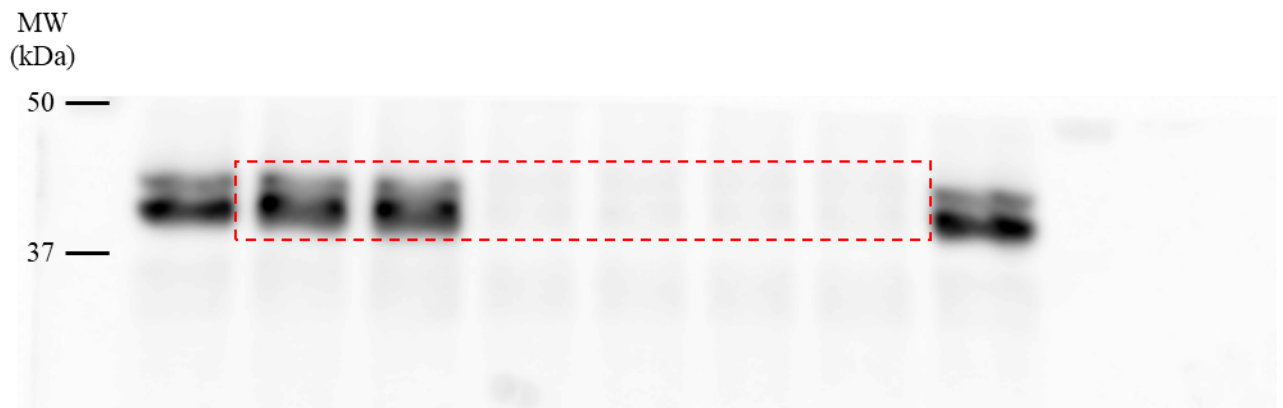

The full blot of ERK in Figure 4B

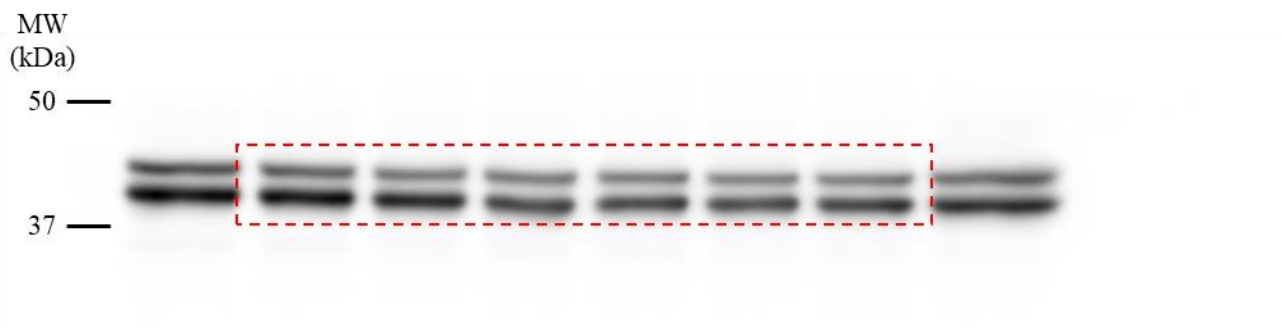

The full blot of p-STAT3 in Figure 4B

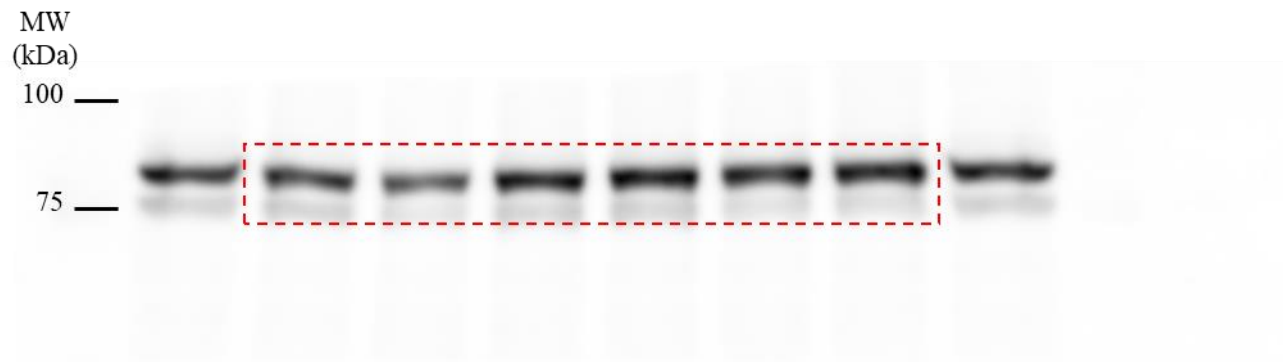

The full blot of STAT3 in Figure 4B

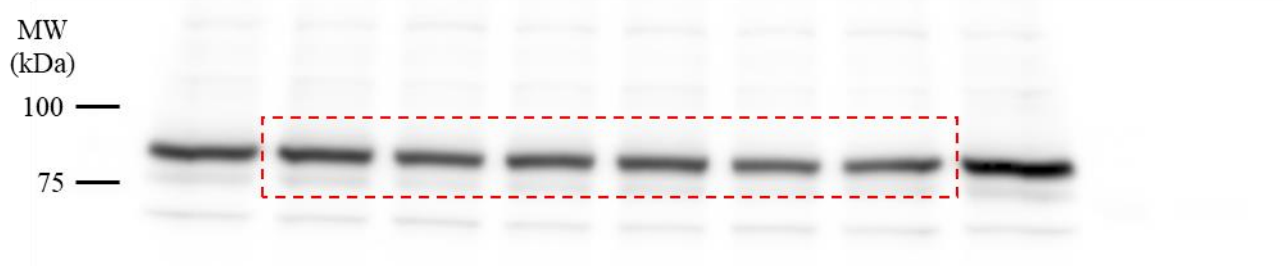

The full blot of survivin in Figure 4B

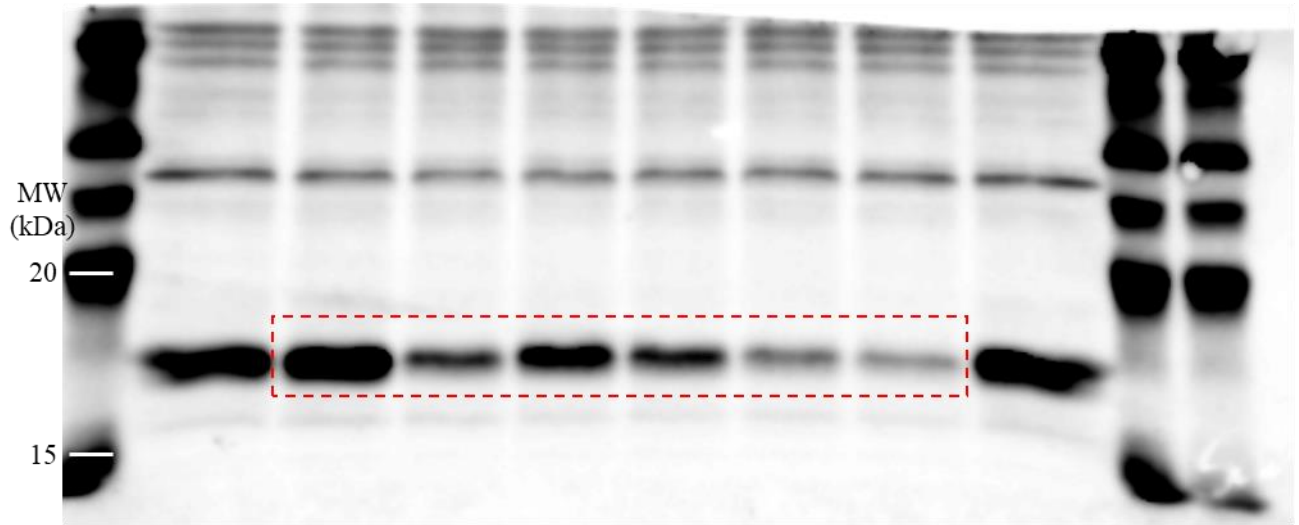

The full blot of  $\beta$ -Actin in Figure 4B

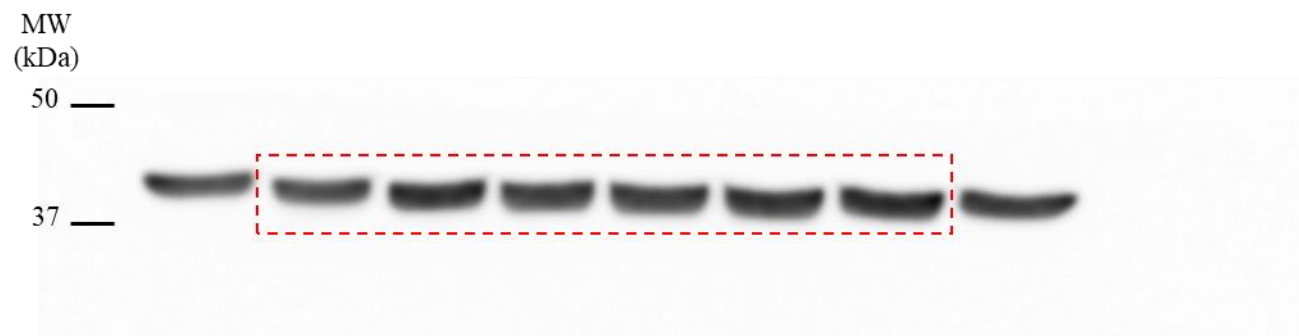

The full blot of p-ALK in Figure 5B

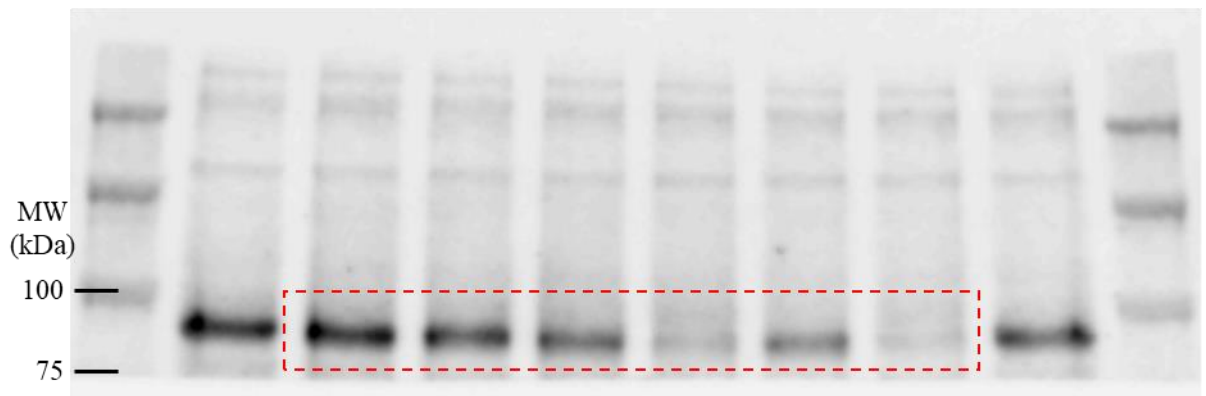

The full blot of ALK in Figure 5B

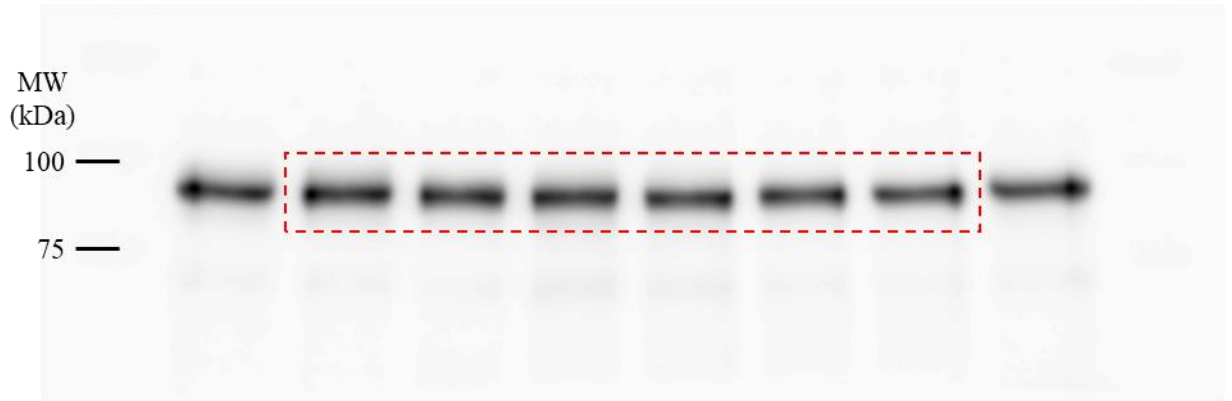

The full blot of p-AKT in Figure 5B

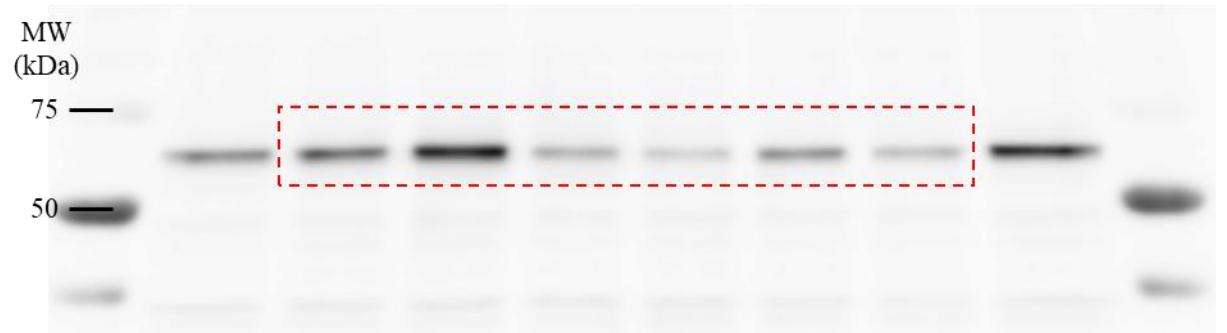

The full blot of AKT in Figure 5B

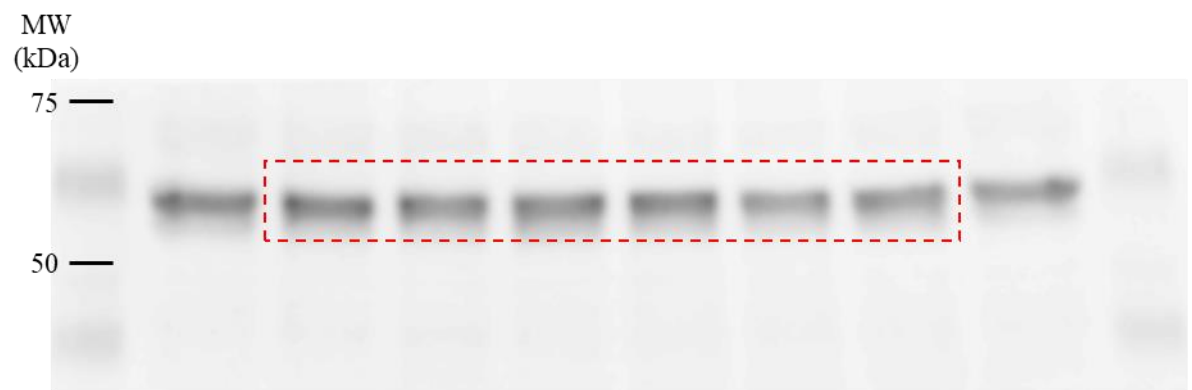

The full blot of p-ERK in Figure 5B

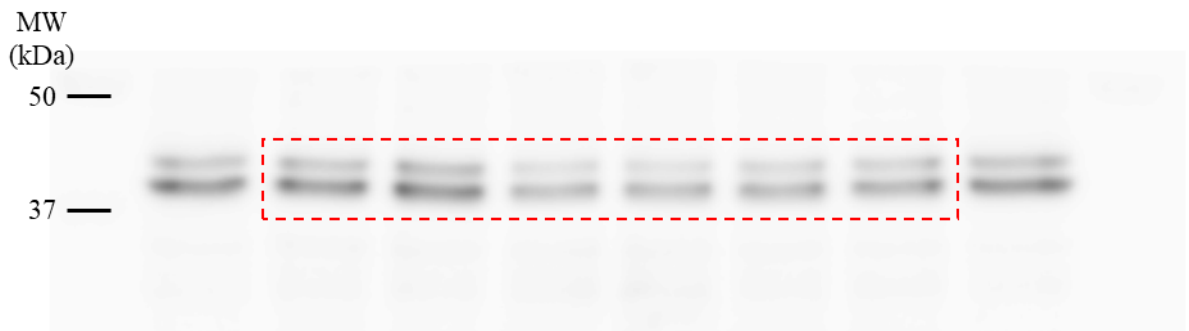

The full blot of ERK in Figure 5B

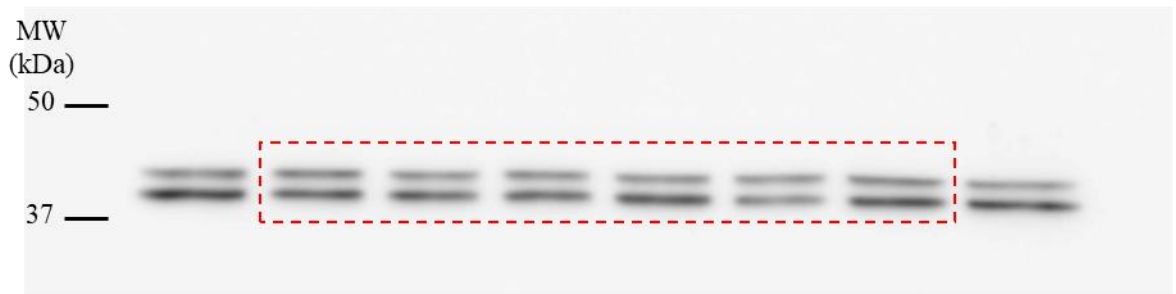

The full blot of p-STAT3 in Figure 5B

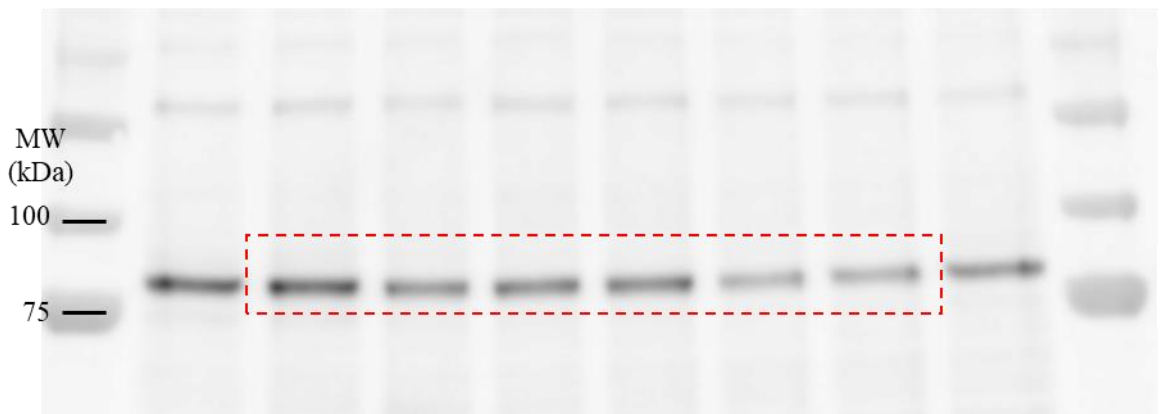

The full blot of STAT3 in Figure 5B

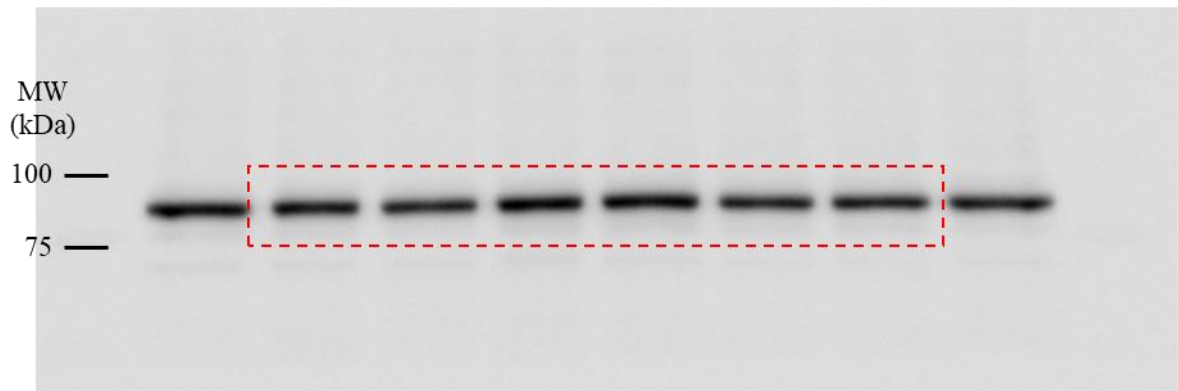

The full blot of survivin in Figure 5B

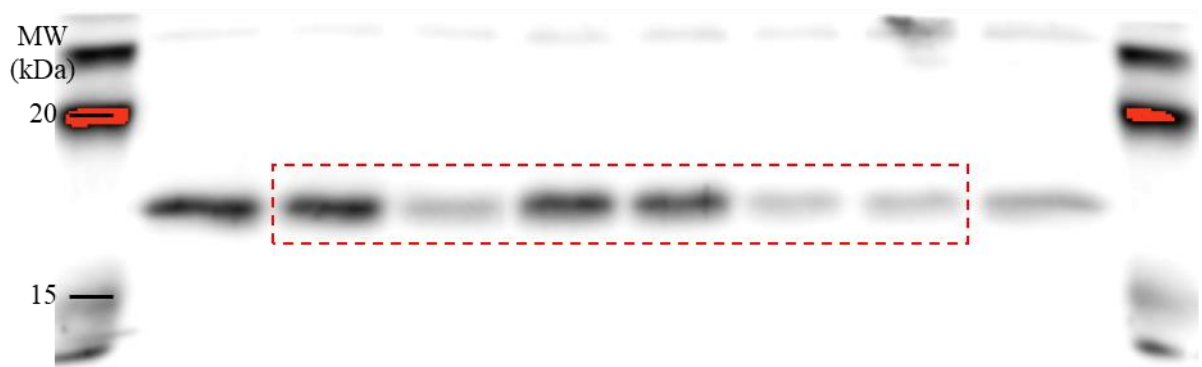

The full blot of  $\beta$ -Actin in Figure 5B

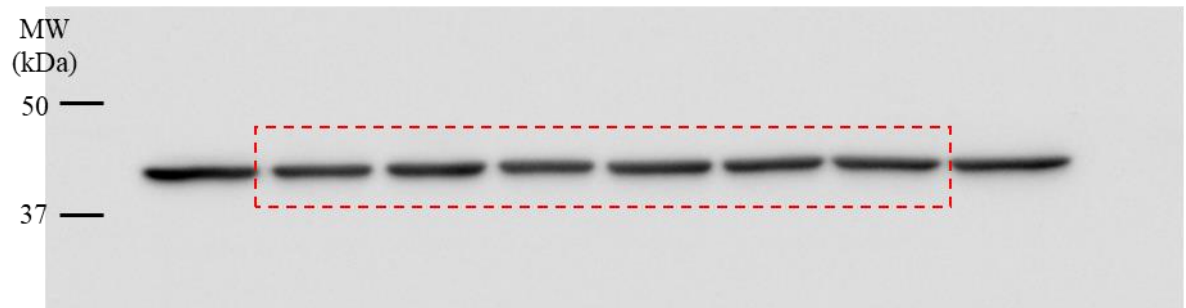

The full blot of p-AKT in Supplementary Figure S2 [high contrast (upper); low contrast (lower)]

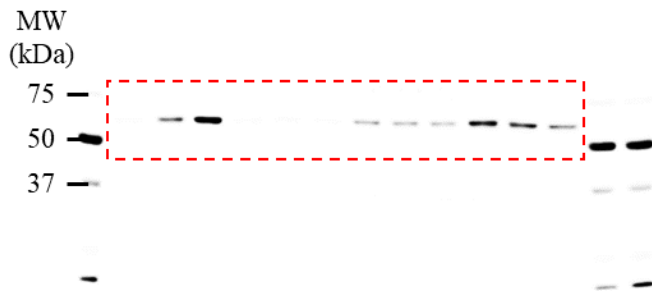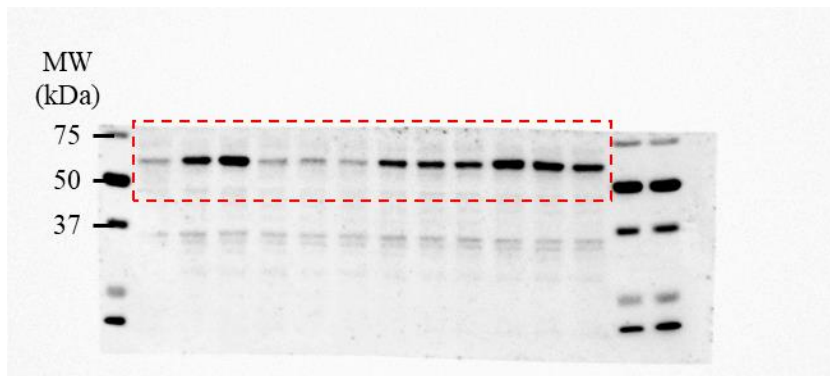

The full blot of AKT in Supplementary Figure S2 [high contrast (upper); low contrast (lower)]

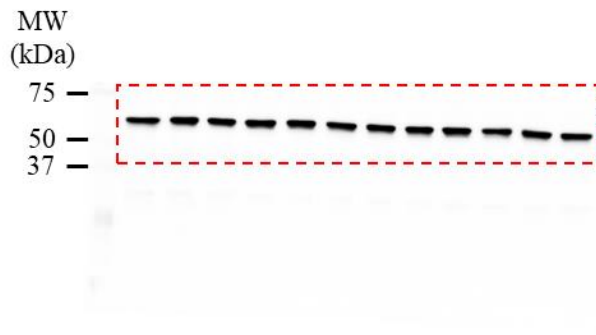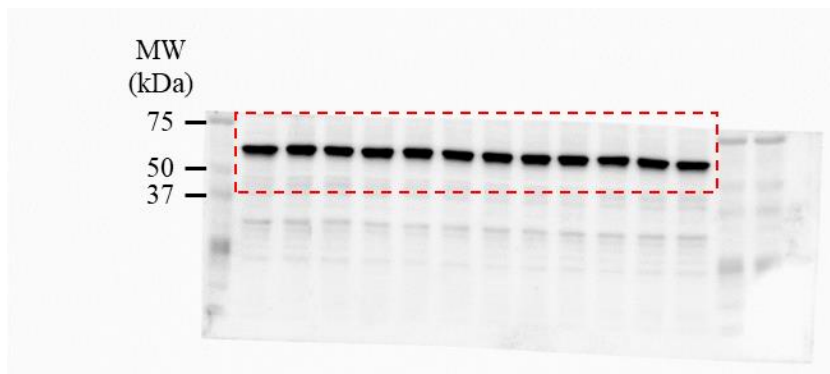



The full blot of p-ERK in Supplementary Figure S2 [high contrast (upper); low contrast (lower)]

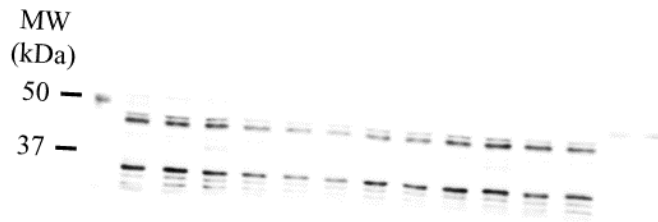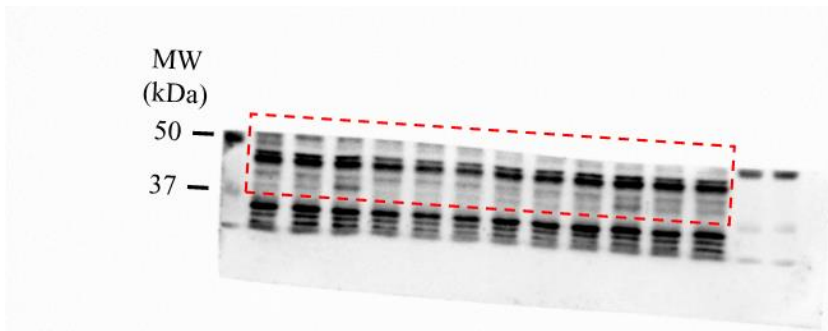

The full blot of ERK in Supplementary Figure S2 [high contrast (upper); low contrast (lower)]

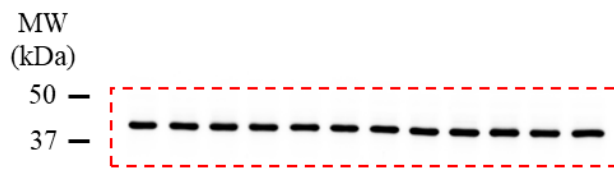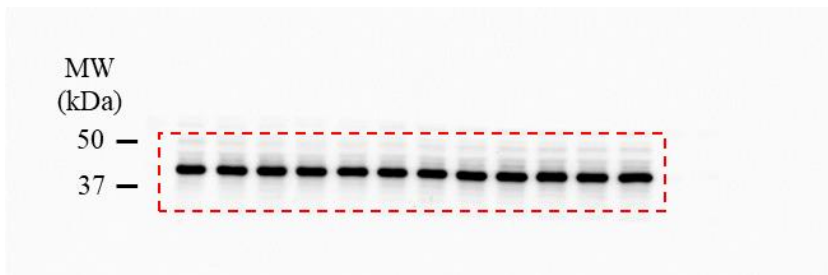

The full blot of p-STAT3 in Supplementary Figure S2 [high contrast (upper); low contrast (lower)]

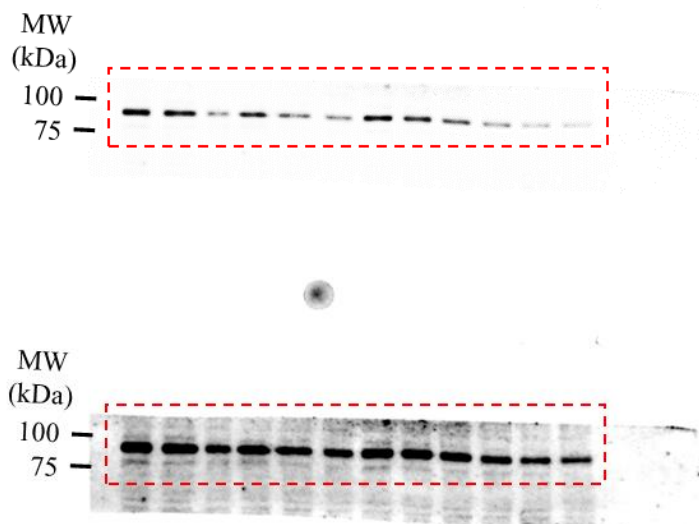

The full blot of STAT3 in Supplementary Figure S2 [high contrast (upper); low contrast (lower)]

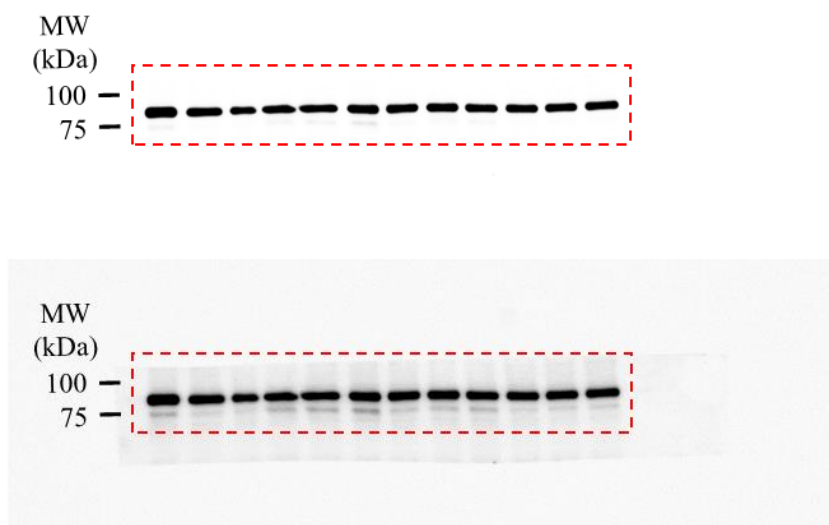

The full blot of survivin in Supplementary Figure S2 [high contrast (upper); low contrast (lower)]

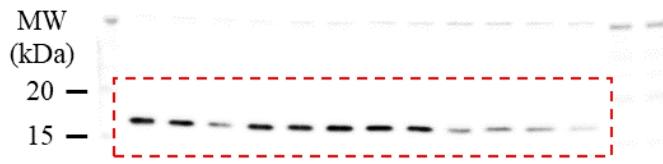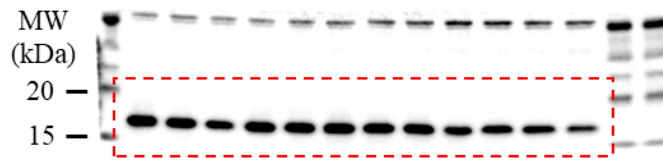

The full blot of  $\beta$ -Actin in Supplementary Figure S2 [high contrast (upper); low contrast (lower)]

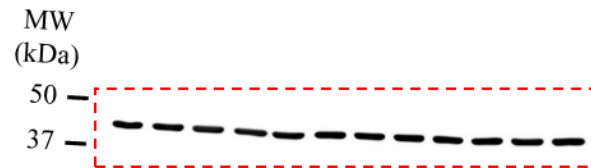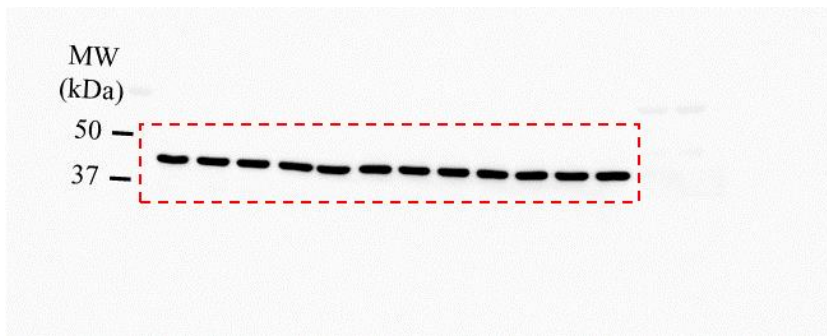

Supplement: 41598_2021_86021_MOESM1_ESM.pdf [file 41598_2021_86021_MOESM1_ESM.pdf]
